# Supplementary material
Source: publisher site journal article supplement (https://www.spandidos-publications.com/1068/downloadSupplementary)

Figure S1. Effect of *METTL14* on BC cell proliferation. Effect of *METTL14* overexpression on (A) MCF7 and (B) MDA-MB-231 cell lines was determined by CCK-8 assay. Data are the means  $\pm$  SDs (n=3). *METTL14*, methyltransferase-like 14; BC, breast cancer.

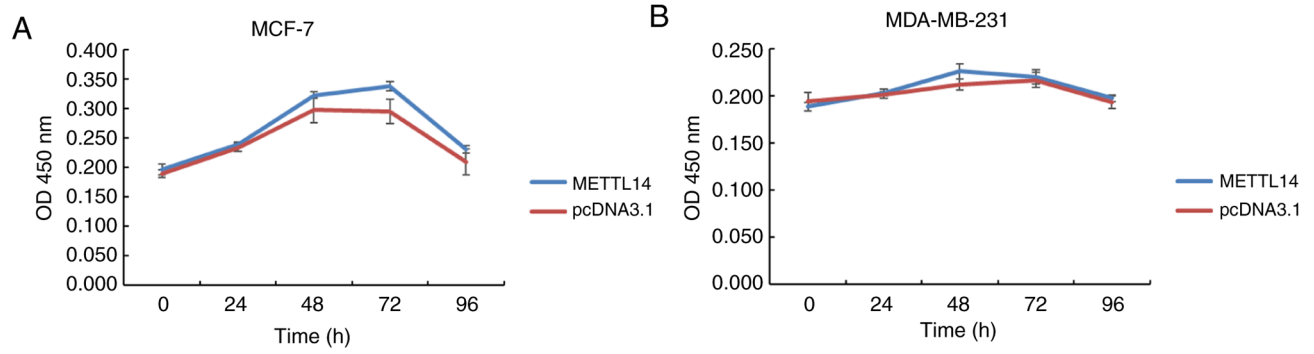

Supplement: Supplementary file 1 [file downloadSupplementary]
